# Supplementary material for: Bread and Shoulders: Reversing the Downward Spiral, a Qualitative Analyses of the Effects of a Housing First-Type Program in France
Source: MDPI journal article supplement (doi:10.3390/ijerph15030520), 2018-03-14
Supplement: s1 [file s1]

**Table S1: objective and subjective change criteria**

## **12 « Objective » change criteria**

### **Residential stability**

- 1: no residential stability
- 2: weak residential stability
- 3: average residential stability (housing and shelter)
- 4: considerable residential stability (several successive housing episodes)
- 5: absolute residential stability (always in the same housing)

### **Reduction in consumption on substances/addiction**

- 1: aggravation of consumption
- 2 : stability in consumption
- 3 : important consumption but less than before entering the program
- 4 : intermittent consumption
- 5 : no more consumption

### **Increase in resources**

- 1: no resources
- 2: fewer resources than before
- 3: same amount of resources as before
- 4: somewhat more resources than before
- 5: many more resources than before

### **Eligibility for entitlements**

- 1: loss of entitlements
- 2: same entitlements as before
- 3: access to entitlements
- 4: obtained several new entitlements
- 5 : all entitlements for which eligible

### **Social ties**

- 1: break in social ties
- 2: no new social relationships outside those with professionals
- 3: at least one social relationship outside those with professionals
- 4: several new social relationships
- 5: increase in and diversification of social relationships

### **Family**

- 1: no relationship to family

- 2: maintains a relationship with one family member
- 3: maintains a relationship with several family members
- 4: contact renewed with one family member
- 5: contact renewed with several family members

### **Sexuality/couple**

- 1: no sexual relations or couple relationship
- 2: keeps a couple relationship
- 3: new relationship/lover
- 4: new couple relationship
- 5: Living in a couple

### **Work**

- 1: no work
- 2: new training
- 3: intermittent work
- 4: return to part-time work
- 5: return to full-time work

### **Activities (outings-leisure-sports-cultural activities etc.)**

- 1: no activities
- 2: fewer activities than before
- 3: same activities as before
- 4: a new activity
- 5: several new activities

### **Physical health**

- 1: In worse health than before
- 2: In bad health like before
- 3: In good health like before
- 4: In better health than before
- 5: In much better health than before

### **Mental health**

- 1: In worse health than before
- 2: In bad health like before
- 3: In good health like before
- 4: In better health than before
- 5: In much better health than before

### **Search for treatment, alternative resources**

- 1: no treatment sought, like before
- 2: treatment seeking, like before
- 3: a new search for treatment
- 4: search for several types of treatment
- 5: search for treatment and alternative resources

## **6 « Subjective » change criteria**

### **Hope, projection, goal-setting**

- 1: no hope, like before
- 2: hope, like before, but no short-term goal-setting
- 3: more hope than before, but no short-term goal-setting
- 4: more hope, short-term goal setting, beginning to project future
- 5: more hope, beginning to project future, short- and medium-term goal setting

### **Reflexivity**

- 1: No reflexivity, like before
- 2: beginnings of reflexivity
- 3: intermittent reflexivity
- 4: strong reflexivity (regarding self, others)
- 5: very strong reflexivity (regarding self, others, proximal environment and society)

### **Identity and social roles**

- 1: Re-acquired a low-esteem identity, like before
- 2: re-acquired a lower-esteem identity
- 3: re-acquired a more positive identity
- 4: re-acquired an identity and new social role
- 5: required a positive identity and several new social roles

### **Ontological security**

- 1: no sense of security, like before
- 2: weak sense of security, like before
- 3: medium sense of security, compared to before
- 4: sense of security about some aspects of life
- 5: complete sense of security

### **Symptom/disorder control**

- 1: no control, like before
- 2: weak control, like before
- 3: occasional better control than before
- 4: good control of persistent symptoms

5: subjective absence of symptoms

#### Elaboration of strategies

1: no strategies, like before

2: some strategies, like before

3: a new strategy

4: several new strategies

5: several effective strategies

**Table S2.** Scores on scale of factors affecting recovery and trajectory type.

| Respondant | Summary calculation (12 objective variables; maximum score = 60). Percentages: actual summary score /maximum possible summary score. | Summary calculation (6 subjective variables; maximum score = 30) Percentages: actual summary score /maximum possible summary score. | Typology of trajectories* |              |
|------------|--------------------------------------------------------------------------------------------------------------------------------------|-------------------------------------------------------------------------------------------------------------------------------------|---------------------------|--------------|
|            |                                                                                                                                      |                                                                                                                                     | Researcher 1              | Researcher 2 |
| Fouad      | 38 - 63%                                                                                                                             | 18 – 60%                                                                                                                            | 2                         | 2            |
| Sabine     | 33 - 55%                                                                                                                             | 15 - 50%                                                                                                                            | 1                         | 1            |
| Dylan      | 40 -66%                                                                                                                              | 28– 93%                                                                                                                             | 3                         | 3            |
| Christian  | 42 - 70%                                                                                                                             | 25 – 83%                                                                                                                            | 3                         | 3            |
| Tom        | 38 – 63%                                                                                                                             | 22 – 73%                                                                                                                            | 2                         | 3            |
| Dominique  | 43 – 71%                                                                                                                             | 20- 66%                                                                                                                             | 2                         | 2            |
| Hamed      | 32 - 53%                                                                                                                             | 17 – 56%                                                                                                                            | 2                         | 2            |
| Mouloud    | 31 – 51%                                                                                                                             | 14 – 23%                                                                                                                            | 2                         | 2            |
| Hervé      | 23 – 38%                                                                                                                             | 14 – 23%                                                                                                                            | 1                         | 1            |
| Raymond    | 35 – 58%                                                                                                                             | 16 – 53%                                                                                                                            | 2                         | 2            |
| Louis      | 42 – 70%                                                                                                                             | 25 – 83%                                                                                                                            | 3                         | 3            |
| Bernard    | 35 – 58%                                                                                                                             | 22 – 73%                                                                                                                            | 1                         | 1            |
| Elias      | 32 – 53%                                                                                                                             | 20 – 66%                                                                                                                            | 2                         | 3            |

**Legend :** Grey shading : experimental group; White shading: control group; \*Type 1 trajectory, experimental group only: downward trajectory before entering the program with a **cushioning effect** on the downward course.

Type 2 trajectory: « Jagged trajectory» with **intermittent positive effect** on the trajectory. Type 3 trajectory: « Split» trajectory” with upward course and bifurcation, or **rebound effect**
